# Supplementary material
Source: Elsevier journal article supplement (https://www.sciencedirect.com/science/article/pii/S2173573520300600)

**Tabla Suplementaria 1.** Supervivencia libre de recidiva local, regional y a distancia a los 5 años en función del valor de albúmina pretratamiento.

|  | **Albúmina** | **Supervivencia libre de recidiva a los 5 años (IC 95%)** | **P** |
| --- | --- | --- | --- |
| **Local** | >46.1 g/L | 77.8% (70.8-84.8%) | 0.0001 |
| 37.5-46.1 g/L | 75.1% (71.0-79.2%) |
| <37.5 g/L | 53.7% (42.8-64.6%) |
| **Regional** | >46.1 g/L | 90.8% (85.8-95.8%) | 0.0001 |
| 37.5-46.1 g/L | 84.0% (80.5-87.5%) |
| <37.5 g/L | 72.9% (62.6-83.2%) |
| **Distancia** | >46.1 g/L | 93.1% (88.8-97.4%) | 0.002 |
| 37.5-46.1 g/L | 88.5% (85.2-91.8%) |
| <37.5 g/L | 77.3% (67.4-87.2%) |

**Figura Suplementaria 1.** Supervivencia específica de acuerdo con las categorías del valor de la albúmina pretratamiento definidas por el análisis de partición recursiva en función del tratamiento. A: tratamiento quirúrgico ± radioterapia/quimio-radioterapia postoperatoria; B: radioterapia/quimio-radioterapia.


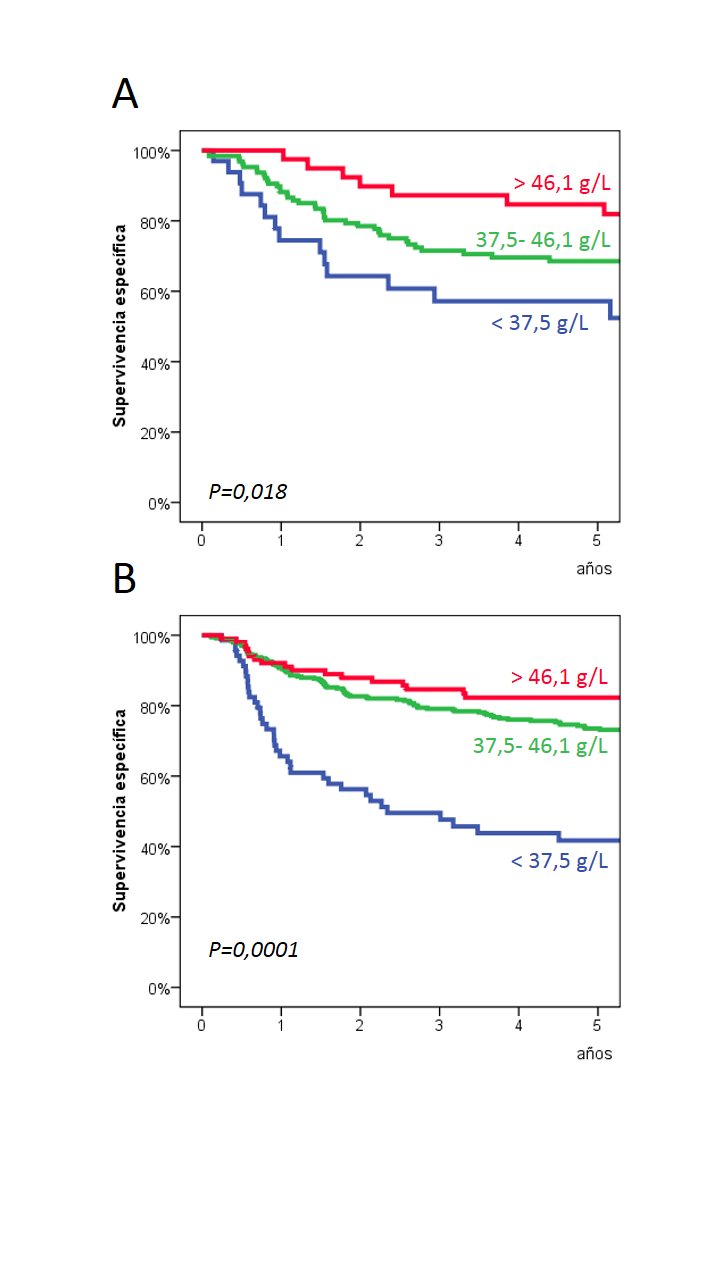


**Figura Suplementaria 2.** Supervivencia específica en función de los niveles de albúmina pretratamiento considerando como puntos de corte 34.0 g/l y 37.5 g/L.


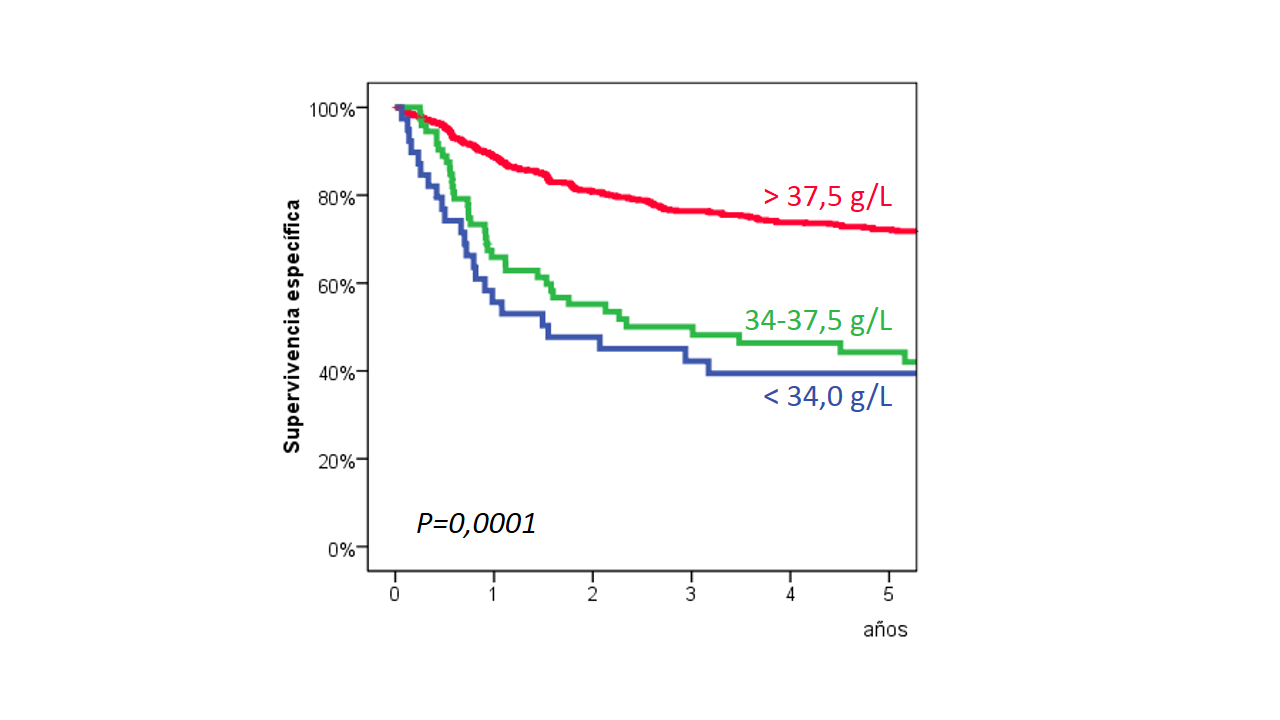

Supplement: mmc1 [file S2173573520300600:mmc1.docx]
